# Supplementary material for: Investigation of complex coastline geometry impact on the evolution of storm surges along the east coast of India: A sensitivity study using a numerical model
Source: Copernicus journal article supplement (doi:10.5194/egusphere-2024-2985), 2024-09-27
Supplement: Supplementary file 1 [file egusphere-2024-2985-supplement.pdf]

# Investigation of complex coastline geometry impact on the evolution of storm surges along the east coast of India: A sensitivity study using a numerical model

Pawan Tiwari<sup>1\*</sup>, Ambarukhana D. Rao<sup>1</sup>, Smita Pandey<sup>1</sup> and Vimlesh Pant<sup>1</sup>

<sup>1</sup>Centre for Atmospheric Sciences  
Indian Institute of Technology Delhi  
New Delhi-110016

\*Corresponding author: Pawan Tiwari (ptiwari474@gmail.com)

## Content of this file

Figure S1

Table S1

Table S2

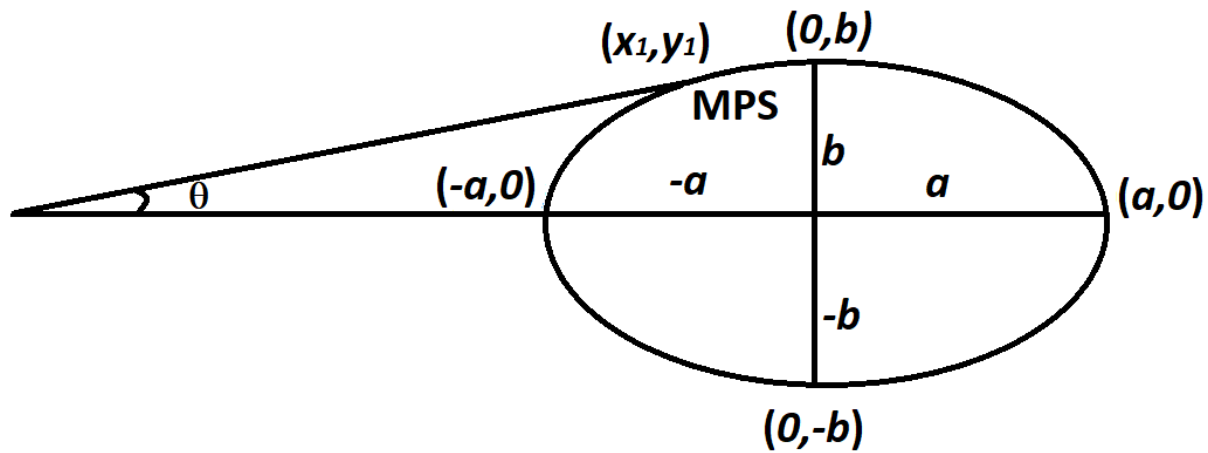

Figure S1. Angle of a tangent ( $\theta$ ) to an ellipse at the point of maximum peak surge (MPS).

**Calculation of angles with respect to maximum peak surge (MPS) location based on the shape of the domain:**

If the shape of the domain is represented by an ellipse, which is given by,

$$\frac{x^2}{a^2} + \frac{y^2}{b^2} = 1 \quad (1)$$

where, “ $a$ ” is the semi-major axis and “ $b$ ” is semi-minor axis. If  $b$  becomes the semi-major axis and  $a$  becomes the semi-minor axis, the equation remains the same. Then, the equation of a tangent angle to an ellipse is given by:

$$\tan \theta = -\frac{b^2 x_1}{a^2 y_1} \quad (2)$$

where  $(x_1, y_1)$  is any point on the ellipse above the semi-major axis as shown in Fig. S1 and in this case, the angle is positive. Similarly, if a point is considered below the semi-major axis, the corresponding angle will be negative. Tables S1 and S2 provide the angles corresponding to different locations of the maximum peak surge (MPS) generated by the various cyclone tracks and different shapes of the domain considered in this study.

**Table S1. Maximum peak surge along with the tangent angle at  $R_{max}$  for the different tracks for the concave shape.**

| Shape (concave) | Track           | Angle (degrees) | MPS (m) |
|-----------------|-----------------|-----------------|---------|
| CC1             | T <sub>2</sub>  | 79.5            | 3.56    |
|                 | T <sub>1</sub>  | 82.7            | 3.59    |
|                 | T <sub>0</sub>  | 86.8            | 3.61    |
|                 | T <sub>-1</sub> | 90.0            | 3.63    |
|                 | T <sub>-2</sub> | -87.0           | 3.62    |
| CC2             | T <sub>2</sub>  | 70.2            | 3.49    |
|                 | T <sub>1</sub>  | 76.2            | 3.56    |
|                 | T <sub>0</sub>  | 84.0            | 3.63    |
|                 | T <sub>-1</sub> | 90.0            | 3.64    |
|                 | T <sub>-2</sub> | -84.4           | 3.64    |
| CC3             | T <sub>2</sub>  | 62.0            | 3.36    |
|                 | T <sub>1</sub>  | 70.4            | 3.49    |
|                 | T <sub>0</sub>  | 81.2            | 3.63    |
|                 | T <sub>-1</sub> | 90.0            | 3.66    |
|                 | T <sub>-2</sub> | -81.6           | 3.65    |
| CC4             | T <sub>2</sub>  | 57.3            | 3.23    |
|                 | T <sub>1</sub>  | 64.7            | 3.39    |
|                 | T <sub>0</sub>  | 78.7            | 3.64    |
|                 | T <sub>-1</sub> | 90.0            | 3.67    |
|                 | T <sub>-2</sub> | -79.0           | 3.67    |
| CC5             | T <sub>2</sub>  | 53.2            | 3.09    |
|                 | T <sub>1</sub>  | 60.0            | 3.30    |
|                 | T <sub>0</sub>  | 76.3            | 3.60    |
|                 | T <sub>-1</sub> | 90.0            | 3.68    |
|                 | T <sub>-2</sub> | -76.1           | 3.65    |
| CC6             | T <sub>2</sub>  | 49.2            | 2.96    |
|                 | T <sub>1</sub>  | 55.3            | 3.21    |
|                 | T <sub>0</sub>  | 74.0            | 3.60    |
|                 | T <sub>-1</sub> | 90.0            | 3.70    |
|                 | T <sub>-2</sub> | -74.5           | 3.64    |

**Table S2. Maximum peak surge along with the tangent angle at  $R_{max}$  for the different tracks for the convex shape.**

| <b>Shape (convex)</b> | <b>Track</b>    | <b>Angle (degrees)</b> | <b>MPS (m)</b> |
|-----------------------|-----------------|------------------------|----------------|
| <b>CV1</b>            | T <sub>2</sub>  | 79.5                   | 3.53           |
|                       | T <sub>1</sub>  | 82.7                   | 3.57           |
|                       | T <sub>0</sub>  | 86.8                   | 3.59           |
|                       | T <sub>-1</sub> | 90.0                   | 3.59           |
|                       | T <sub>-2</sub> | -87.0                  | 3.57           |
| <b>CV2</b>            | T <sub>2</sub>  | 70.2                   | 3.36           |
|                       | T <sub>1</sub>  | 76.2                   | 3.47           |
|                       | T <sub>0</sub>  | 84.0                   | 3.56           |
|                       | T <sub>-1</sub> | 90.0                   | 3.57           |
|                       | T <sub>-2</sub> | -84.4                  | 3.54           |
| <b>CV3</b>            | T <sub>2</sub>  | 62.0                   | 3.17           |
|                       | T <sub>1</sub>  | 70.4                   | 3.36           |
|                       | T <sub>0</sub>  | 81.2                   | 3.51           |
|                       | T <sub>-1</sub> | 90.0                   | 3.54           |
|                       | T <sub>-2</sub> | -81.6                  | 3.51           |
| <b>CV4</b>            | T <sub>2</sub>  | 57.3                   | 2.96           |
|                       | T <sub>1</sub>  | 64.7                   | 3.25           |
|                       | T <sub>0</sub>  | 78.7                   | 3.46           |
|                       | T <sub>-1</sub> | 90.0                   | 3.53           |
|                       | T <sub>-2</sub> | -79.0                  | 3.45           |
| <b>CV5</b>            | T <sub>2</sub>  | 53.2                   | 2.81           |
|                       | T <sub>1</sub>  | 60.0                   | 3.11           |
|                       | T <sub>0</sub>  | 76.3                   | 3.40           |
|                       | T <sub>-1</sub> | 90.0                   | 3.52           |
|                       | T <sub>-2</sub> | -76.1                  | 3.39           |
| <b>CV6</b>            | T <sub>2</sub>  | 49.2                   | 2.71           |
|                       | T <sub>1</sub>  | 55.3                   | 3.05           |
|                       | T <sub>0</sub>  | 74.0                   | 3.38           |
|                       | T <sub>-1</sub> | 90.0                   | 3.48           |
|                       | T <sub>-2</sub> | -74.5                  | 3.38           |
